1 **Buffering Agent Induced Lactose Content Increases via Growth**  
2 **Hormone-Mediated Activation of Gluconeogenesis in Lactating**  
3 **Goats**

4 **Authorship**

5 Lin Li<sup>1</sup>, MeiLin He<sup>1</sup>, Ying Liu<sup>1</sup>, Yuanshu Zhang<sup>1,\*</sup>

6

7

8 **Author Addresses**

9 <sup>1</sup>Key Laboratory of Animal Physiology and Biochemistry, Ministry of Agriculture,

10 Nanjing Agricultural University, Nanjing 210095, PR China

11

12

13

14 **Corresponding Author Contact Information**

15 \*Corresponding author. Yuanshu Zhang. E-mail address: zhangyuanshu@njau.edu.cn

16

17

18

19

20

21

22

23

24 **Abstract:**

25 Dairy goats are often fed a high-concentrate (HC) diet to meet lactation demands;  
26 however, long-term concentrate feeding is unhealthy and decreases milk yield and  
27 lactose content. Therefore, we tested whether a buffering agent increases the output of  
28 glucose in the liver and influences of lactose synthesis. In this study, sixteen lactating  
29 goats were randomly assigned to two groups: one group received a HC diets  
30 (Concentrate : Forage = 6:4, HG), and the other group received the same diet with a  
31 buffering agent added (0.2% NaHCO<sub>3</sub>, 0.1% MgO, BG) as a treatment for 19-weeks  
32 experimental period. The results showed that the total volatile fatty acids and  
33 lipopolysaccharide (LPS) declined in the rumen leading to the rumen pH was  
34 stabilized in the BG group. Milk yield and lactose content increased. The alanine  
35 aminotransferase, aspartate transaminase, alkaline phosphatase, pro-inflammatory  
36 cytokines, LPS and lactate content in the plasma was significantly decreased, whereas  
37 prolactin and growth hormone levels were increased. The hepatic vein content of  
38 glucose was increased. In addition, the expression of pyruvate carboxylase (PC),

39 phosphoenolpyruvate carboxykinase (PEPCK) and glucose-6-phosphatase (G6PC) in  
40 the liver was significantly up-regulated. In mammary gland, the glucose transporter  
41 type-1, 8, 12 and sodium-glucose cotransporter-1 levels were increased. Cumulatively,  
42 the buffering agent treatment increased blood concentrations of glucose via the  
43 gluconeogenes and promoting their synthesis in the liver. It may contribute to  
44 the increase in milk yield and lactose synthesis of lactating goats.

45 **Keywords:** Magnesium oxide, Sodium bicarbonate, high-concentrate diet, Hepatic  
46 gluconeogenesis

## 47 **Introduction**

48 In the dairy industry, it is currently common practice to feed a high-concentrate (HC)  
49 diet to lactating cows or goats to meet their energy requirements to support high milk  
50 production. However, long-term high concentrate feeding is harmful to the health of  
51 ruminants and leads to a decrease in milk yield [1]. It was reported that feeding of HC  
52 diets to lactating cows causes a decline in the rumen pH if organic acids, such as  
53 volatile fatty acid (VFA) and lactic acid, accumulate in the rumen[2]. Digestion of a  
54 HC diets results in less production of saliva and bicarbonate, and reduced buffering  
55 capacity coupled with greater accumulation of organic acids has been reported to  
56 increase the incidence of subacute ruminal acidosis (SARA)[3]. A rumen pH of less  
57 than 5.8 for over 4 h per day is used as a parameter to determine the occurrence of  
58 SARA[4]. In addition, decreased rumen pH results in the release of  
59 lipopolysaccharide (LPS), which originate from the cell-wall component of

60 gram-negative bacteria[5]. Previous studies have shown that LPS can translocate into  
61 the bloodstream from the digestive tract under conditions of high permeability, and  
62 after injury to the liver tissue [6].

63 In the ruminant, lactose constitutes about 40% of total solids in milk composition. As  
64 lactose maintains the osmolarity of milk, the rate of lactose synthesis serves as a  
65 major control of the volume of milk yield [7]. Glucose is the main precursor of lactose  
66 synthesis in the epithelial cell of the mammary gland, however, the mammary gland  
67 cannot synthesize glucose from other precursors due to the lack of glucose  
68 6-phosphatase (G6PC)[8]. Therefore, the mammary gland is dependent on the blood  
69 supply for its glucose needs and as a consequence, mammary glucose uptake is a  
70 rate-limiting factor for milk yield[9]. Liver glycometabolism of ruminants is different  
71 from monogastric animals. In the lactating dairy cows, glucose is supplied primarily  
72 by hepatic gluconeogenesis to maintain stable blood glucose[10]. Dairy cows  
73 experience an increased demand for glucose to support whole body glucose  
74 metabolism and to supply glucose for lactose synthesis[11]. Therefore, liver  
75 gluconeogenesis plays an important role in the lactose synthesis of mammary gland.

76 Buffering agent could enhance the acid base buffer capacity and has been used to  
77 prevent ruminant rumen SARA and improve the production performance. Previous  
78 studies indicated that the addition of sodium bicarbonate ( $\text{NaHCO}_3$ ), magnesium  
79 oxide ( $\text{MgO}$ ) to a diet could be given to lactating cows to increase the content of  
80 lactose, as well as milk yield[12]. It is well documented that dietary addition of 2%  
81  $\text{NaHCO}_3$  could increase the buffering capacity and prevent the acidosis in rumen[13].

82 However, at present, the research of buffering agent is focused on the composition  
83 and production of milk from dairy cows. Furthermore, little is known regarding the  
84 mechanism of how a buffering agent improves milk yield and lactose content in goats.  
85 In this study, we created a buffering agent consisting of (0.2% NaHCO<sub>3</sub>, 0.1% MgO)  
86 and mixed it with a high-concentrate diet source that was fed to lactating goats. We  
87 then investigated the effect of this buffering agent on the development of SARA and  
88 milk yield and lactose content to elucidate potential mechanisms for this phenomenon.

## 89 **Materials and Methods**

### 90 **Ethical approval**

91 The Institutional Animal Care and Use Committee of Nanjing Agricultural University  
92 (Nanjing, People's Republic of China) approved all of the procedures (surgical  
93 procedures and care of goats). The protocol of this study was reviewed and approved  
94 specifically, with the project number 2011CB100802. The slaughter and sampling  
95 procedures strictly followed the 'Guidelines on Ethical Treatment of Experimental  
96 Animals' (2006) no. 398 set by the Ministry of Science and Technology, China and the  
97 'Regulation regarding the Management and Treatment of Experimental Animals'  
98 (2008) no. 45 set by the Jiangsu Provincial People's Government.

### 99 **Animals and experimental procedures**

100 Sixteen healthy multiparous mid-lactating saanen goats (body weight,  $39 \pm 7$  kg,  
101 mean  $\pm$  SEM, 3-4 weeks post-partum) at the age of 2-4 years were used in  
102 experiments. They were housed in individual stalls in a standard animal feeding house

103 at Nanjing Agricultural University (Nanjing, China). All goats were randomly divided  
104 into two groups: one group received a high-concentrate diet (Concentrate : Forage =  
105 6:4, HG, n=8), and the other group received the same diet with a buffering agent  
106 added (0.2% NaHCO<sub>3</sub>, 0.1% MgO, purchased from Nanjing Jiancheng  
107 Bioengineering Institute, China, BG, n=8) as a treatment. The ingredients and  
108 nutritional composition of the diets are presented in Table 1. The animals were fed the  
109 respective diets for 19 weeks, and had free access to water during the experimental  
110 period.

111 Prior to the initiation of the experiment, all of the goats were installed rumen fistula  
112 and hepatic catheters. Specific steps are as follows: First, all goats were installed  
113 rumen cannula, and indwelt with hepatic and portal vein catheters, under general  
114 anaesthesia by inhalation of isoflurane (2.5% in 1:1 mixture of oxygen and air; Abbott  
115 Scandinavia AB, Solna, Sweden). Reflexes (pupillary and palpebral) and respiratory  
116 rate were monitored before and during the surgery to verify anaesthetic depth. Next, a  
117 small cannula constructed from polyvinylchloride was inserted into the rumen of each  
118 goat[14]. After rumen fistula surgery, all goats were ruminally cannulated, fitted with  
119 indwelling catheters in the portal vein and hepatic vein[15]. At the end of these  
120 procedures the goats received an intramuscular injection of flunixin meglumine [2 mg  
121 (kg body weight)<sup>-1</sup>], an anti-inflammatory and analgesic (Banamine; Mantecorp Ind.  
122 Quím. e Farm. Ltda, Rio de Janeiro, Brazil) and their respiratory movements were  
123 monitored until they regained consciousness. Goats were continuously monitored for  
124 1 h after the surgery, and all animals used in the experiments on the day after

125 presented in a good and stable clinical condition with no signs of inflammation or  
126 pain problems. After surgery, goats were observed for 2 weeks during recovery from  
127 the surgery. Sterilized heparin saline (500 IU/mL, 0.3 mL/time) was administered at  
128 6-hour intervals every day until the end of the experiment to prevent catheters from  
129 becoming blocked.

### 130 **Rumen fluid collection and analysis**

131 Fifteen minutes prior to feed delivery and 0, 2, 4, 6, 8 and 10 h after feed delivery on 7  
132 consecutive days during week 19, 20 mL rumen fluids was collected with a nylon bag  
133 and the pH value was measured immediately with pH-meter.

134 The rumen fluid was collected and each sample was transferred into a 50-mL sterile  
135 tube and kept on ice until transported to the laboratory for the initial processing before  
136 LPS determination. Another part of each rumen fluid sample was centrifuged at 3,200  
137  $\times$  g for 10 min at 4°C immediately after collection and the supernatant was collected.  
138 To analyze VFA in ruminal fluid, a 5-mL aliquot was deproteinized with 1 mL of 25%  
139 metaphosphoric acid. These samples were stored at -20°C until analysis.

140 The concentration of LPS in rumen fluid was measured by a Chromogenic End-point  
141 Tachypleus Amebocyte Lysate Assay Kit (Chinese Horseshoe Crab Reagent  
142 Manufactory Co. Ltd, Xiamen, China). Pretreated rumen fluid samples were diluted  
143 until their LPS concentrations were in the range of 0.1-1.0 endotoxin units (EU)/mL  
144 relative to the reference endotoxin.

145 VFA were measured using capillary column gas chromatography (GC-14B, Shimadzu,

146 Japan; Capillary Column: 30 m × 0.32 mm × 0.25 mm film thickness; Column  
147 temperature = 110°C, injector temperature = 180°C, detector temperature = 180°C).

#### 148 **Plasma biochemical parameters analysis**

149 In the 19<sup>th</sup> week, blood samples were collected from the jugular vein, hepatic vein and  
150 portal vein blood in 10 mL vacuum tubes containing sodium heparin. Blood was  
151 centrifuged at 3000 x g for 15 min to separate the plasma, which was then stored at  
152 -20°C until analysis. The plasma glucose content was quantified using a Beckman Kurt  
153 AU5800 series automatic biochemical analyzer (Beckman Kurt, USA) at the General  
154 Hospital of Nanjing Military Region (Nanjing, China).

155 The growth hormone (GH), tumor necrosis factor- $\alpha$  (TNF- $\alpha$ ), interleukin 1 $\beta$  (IL-1 $\beta$ )  
156 concentration in the plasma were measured by radioimmunoassay with commercially  
157 available human radioimmunoassay kits purchased from Beijing North Institute of  
158 Biological Technology. The detection range of radioimmunoassay kits for GH (rabbit,  
159 B12PZA), TNF- $\alpha$  (rabbit, C06PZA) and IL-1 $\beta$  (rabbit, C09PDA) were 0.1-50 ng/mL,  
160 1-10 ng/mL and 0.1-8.1 ng/mL, respectively. All of the procedures were performed  
161 according to the manufacturer's instructions.

162 The analyses for the prolactin, glucocorticoids, histamine and lactate were performed  
163 using Enzyme-Linked Immunosorbent Assay (ELISA) kit (Shanghai Enzyme-linked  
164 Biotechnology Co. Ltd, Shanghai, China) according to the manufacturer's  
165 instructions. The detected range of ELISA kits for prolactin, glucocorticoids,  
166 histamine and lactate were 5-2000 pg/mL, 0-80 ng/mL, 2-600 ng/mL and 0.1-30



167 mmol/mL, respectively. The LPS concentration were determined using a chromogenic  
168 endpoint assay (CE64406, Chinese Horseshoe Crab Reagent Manufactory Co., Ltd.,  
169 Xiamen, China) with a minimum detection limit of 0.01 EU/mL. The procedures were  
170 performed according to the manufacturer's instructions.

### 171 **Milk composition analysis**

172 Goats were milked at 8:30 h and 18:30 h, and the milk yield was recorded daily. A  
173 50-mL milk sample was taken to determine the lactose content once a week  
174 (Milk-Testing™ Milkoscan 4000, FOSS, Denmark) at the Animal Experiment Center  
175 of College of Animal Science and Technology at the Nanjing Agricultural University.

### 176 **Sample collection**

177 In the 19<sup>th</sup> week, mammary gland tissues were obtained by biopsy after 4 h after the  
178 morning feeding. Local anesthesia (2% lidocaine hydrochloride) was administered  
179 into breast skin in a circular pattern surrounding the incision site, then a 2cm incision  
180 was made and mammary gland tissue was dissected. Tissue samples (500-800 mg)  
181 were rinsed with 0.9% saline, snap frozen in liquid nitrogen and were used for RNA  
182 extraction. Goats were slaughtered after overnight fasting. Incisions were sutured, and  
183 antibiotics were administered intramuscularly to avoid infection.

184 After 19 weeks, all goats were killed with neck vein injections of xylazine [0.5 mg  
185 (kg body weight)<sup>-1</sup>; Xylosol; Ogris Pharme, Wels, Austria] and pentobarbital [50 mg  
186 (kg body weight)<sup>-1</sup>; Release; WDT, Garbsen, Germany]. After slaughter, liver tissue  
187 was collected and washed twice with cold physiological saline (0.9% NaCl) to

188 remove blood. Livers were then transferred into liquid nitrogen and used for RNA and  
189 protein extraction.

## 190 **RNA isolation, cDNA synthesis and real-time PCR**

191 Total RNA was extracted from liver samples using TRIzol reagent (15596026,  
192 Invitrogen, USA) and converted to cDNA using commercial kits (Vazyme, Nanjing,  
193 China). All PCR primers were synthesized by Generay Company (Shanghai, China);  
194 the primer sequences are listed in Table 2. PCR was performed using the AceQ qPCR  
195 SYBR Green Master Mix Kit (Vazyme, Nanjing, China) and the MyiQ2 Real-time  
196 PCR System (Bio-Rad, USA) with the following cycling conditions: 95°C for 2 min,  
197 40 cycles of 95°C for 15 sec and 60°C for 30 sec. Glyeraldehyde 3-phosphate  
198 dehydrogenase (GAPDH) served as a reference for normalization. The  $2^{-\Delta\Delta Ct}$  method  
199 was used to analyse the real-time PCR results, and each gene mRNA level is  
200 expressed as the fold change relative to the mean value of the control group.

## 201 **Western blot analysis**

202 Total protein was extracted from frozen liver samples, and the concentration was  
203 determined using a bicinchoninic acid (BCA) assay kit (Pierce, Rockford, IL, USA).  
204 We isolated 30 µg of total protein from each sample, which was subjected to  
205 electrophoresis on a 10% SEMS-PAGE gel. The separated proteins were transferred  
206 onto nitrocellulose membranes (Bio Trace, Pall Co., USA). The blots were incubated  
207 with the following primary antibodies for overnight at 4°C at dilutions of 1:1000 in  
208 block: rb-anti-phosphoenolpyruvate carboxykinase (rb-anti-PEPCK, #12940, CST),

209 rb-anti-glucose transporter type 1 (rb-anti-GLUT1, ab14683, Abcam) and  
210 rb-anti-glucose transporter type 12 (rb-anti-GLUT12, ab100993, Abcam). A  
211 rb-anti-GAPDH primary antibody (A531, Bioworld, China, 1:10,000) was also  
212 incubated with the blots to provide a reference for normalization. After washing the  
213 membranes, an incubation with HRP-conjugated secondary antibody was performed  
214 for 2 h at room temperature. Finally, the blots were washed, and the signal was  
215 detected by enhanced chemiluminescence (ECL) using the LumiGlo substrate (Super  
216 Signal West Pico Trial Kit, Pierce, USA). The ECL signal was recorded using an  
217 imaging system (Bio-Rad, USA) and analyzed with Quantity One software (Bio-Rad,  
218 USA).

### 219 **Statistical analysis**

220 The results were expressed as mean  $\pm$  SEM. The data of ruminal pH and glucose in  
221 plasma of hepatic vein, portal vein and jugular vein were analyzed for differences due  
222 to diet, feeding time, and their interactions by Univariate using the General Linear  
223 Models of SPSS 11.0 for Windows (StatSoft Inc, Tulsa, OK, USA). The differences in  
224 milk yield, lactose content, plasma biochemical index, mRNA and protein expression  
225 between two groups were analyzed by Independent-Samples T test using the Compare  
226 Means of SPASS 11.0 for Windows (StaSoft Inc, Tulsa, OK, USA). Data were  
227 considered statistically significant if  $P < 0.05$ ,  $P < 0.01$ . The numbers of replicates  
228 used for statistics are noted in the Tables and Figures.

229

230 **Results**

231 **The buffering agent treatment increased daily milk yield and lactose content in**  
232 **lactating goats**

233 We quantified the daily milk yield and lactose content in the milk of the two  
234 experimental groups from 1 to 19 weeks of treatment. During week 1 to week 2,  
235 there was no significant difference in average daily milk yield and lactose content  
236 between BG goats and HG goats. However, the average daily milk yield ( $P < 0.05$ )  
237 and lactose content ( $P < 0.01$ ) increased significantly in the BG group from 3-19  
238 weeks of treatment compared to the HG group (Fig. 1).

239 **The buffering agent treatment stabilized ruminal fluid pH in lactating goats fed a**  
240 **high-concentrate diet**

241 After feeding 19 weeks, the dynamic pH curve in the BG group was higher than that  
242 in the HG group during the long-term experiment. It showed that a pH value under 5.8  
243 lasted for 6 h in the HG group, which indicated that SARA was successfully induced.  
244 The pH value of the BG group was significantly increased in comparison to those in  
245 the HG group ( $P < 0.05$ ). However, ruminal pH was affected significantly by  
246 digesting time, while there was no interaction of digesting time and diet on ruminal  
247 pH ( $P > 0.05$ ; Fig. 2).

248 **VFA and LPS concentrations in rumen fluid**

249 As shown in Table 3, BG goats showed significantly lower level of LPS concentration

250 in rumen fluid than HG goats. Concentrations of total VFA, propionate, butyrate in  
251 rumen fluid were significantly decreased in BG goats compared to HG ( $P < 0.05$ ).  
252 However, the ratio of propionate to butyrate in the rumen was significantly elevated in  
253 the BG group ( $P < 0.05$ ).

254 **The buffering agent treatment changed plasma hormone, enzyme, primary**  
255 **pro-inflammatory cytokines and metabolic produced in the lactating goats**

256 As shown in Table 4, the plasma content of alanine aminotransferase (ALT), aspartate  
257 transaminase (AST) and alkaline phosphatase (AKP) were significantly lower in the  
258 BG group compared to the HG group ( $P < 0.05$ ). Although the plasma content of  
259 lactic dehydrogenase (LDH) was declined, there was no significant difference  
260 between BG and HG groups. The pro-inflammatory cytokines including TNF- $\alpha$  and  
261 IL-1 $\beta$  in the BG were significantly lower than that in the HG goats ( $P < 0.05$ ).  
262 Meanwhile, we found that the metabolism products of LPS, histamine and lactate  
263 content were also lower in the BG goats compared to the HG goats. Among them, LPS  
264 and lactate were significant different ( $P < 0.05$ ). Moreover, the BG goats showed  
265 significantly higher levels of GH and prolactin concentration in plasma than HG goats,  
266 while there was no significant difference of glucocorticoids concentration in plasma  
267 between BG and HG goats.

268 **The buffering agent treatment regulated enzymes required for glucose transfer in**  
269 **the mammary gland of lactating goats**

270 We found that the mRNA expression of glucose transporter type 1 (GLUT1), glucose

271 transporter type 8 (GLUT 8), glucose transporter type 12 (GLUT12) and  
272 sodium-glucose cotransporter 1 (SGLT1) were also higher in the BG goats compared  
273 to expression in the HG goats. In particular, expression of GLUT1 and SGLT1 were  
274 significantly higher than that in the HG goats ( $P < 0.05$ ). The level of GLUT1 protein  
275 expression in the mammary gland was significantly up-regulated in BG goats  
276 compared to HG ( $P < 0.05$ ). Additionally, there was a tendency increase in protein  
277 expression of GLUT12 in BG goats (Fig. 3).

#### 278 **The buffering agent treatment increased production of glucose in the liver**

279 We next examined glucose in plasma obtained from the jugular vein, hepatic vein and  
280 portal vein of both treatment groups. After 19 weeks feeding, the jugular and hepatic  
281 vein content of glucose was significantly increased in the BG group compared to the  
282 HG group ( $P < 0.01$ ). The portal vein content of glucose was increased, but there was  
283 no significant difference between BG and HG groups. Compared to HG group, we  
284 found that the glucose content of BG group was significantly higher in the hepatic  
285 vein compared to the portal vein ( $P < 0.05$ , Table 5). This indicates that more glucose  
286 is produced in the liver. It is possible that the synthesis of glucose was activated  
287 following treatment with the buffering agent.

#### 288 **The buffering agent treatment regulated enzymes required for gluconeogenesis** 289 **and GHR in the livers of lactating goats**

290 We found that the mRNA expression of phosphoenolpyruvate carboxykinase (PEPCK)  
291 and pyruvate carboxylase (PC), glucose-6-phosphatase (G6PC) was higher in the BG

292 goats compared to expression in the HG goats. In particular, expression of PEPCK and  
293 G6PC were significantly higher than that in the HG goats ( $P < 0.05$ ). The level of  
294 PEPCK protein expression in the liver was significantly up-regulated in BG goats  
295 compared to HG ( $P < 0.05$ ). This is consistent with our previous observation that  
296 PEPCK mRNA expression increases in BG goats (Fig. 4). Taken together, these results  
297 suggested that treatment with the buffering agent promoted the gluconeogenesis in the  
298 liver. The level of GHR expression in the liver was significantly up-regulated in BG  
299 goats compared to HG ( $P < 0.05$ , Fig. 5).

## 300 **Discussion**

301 In recent years, dairy goats are often fed HC diets to meet the energy demand for high  
302 milk yields. However, the consumption of a HC diets is harmful to the health of dairy  
303 goats [16,17]. It's well documented that feeding HC diets to ruminants results in  
304 subacute ruminal acidosis (SARA), a common metabolic disease especially occurred  
305 in high-producing animals. The root cause is that excessive amounts of rapidly  
306 fermentable nonstructural carbohydrates increase the accumulation of organic acids  
307 and shift of microbial population in gastrointestinal tract in ruminants [18]. Moreover,  
308 an increased amount of fermentable carbohydrates, such as starch, pass through the  
309 forestomach to the intestinal tract in acidosis, which accelerates intestinal tract  
310 fermentation[19]. It ultimately affects the intestinal absorption of nutrients.  
311 Importantly, in accordance with previous research, long-term feeding a  
312 high-concentrate diet could induce the depression of the content of lactose and milk  
313 yield[20].

314 The NaHCO<sub>3</sub> could increase the buffering capacity and prevent acidosis in the rumen.  
315 It was reported that the rumen pH profile improved and a higher yield of milk and  
316 milk solids when NaHCO<sub>3</sub> was supplemented to a high-concentrate diet [21].  
317 Previous studies indicated that the addition of NaHCO<sub>3</sub> and MgO to  
318 restricted-roughage rations for goats could increase the content of lactose and milk  
319 yield [22]. Prolactin is involved in the development of the mammary gland, and the  
320 start and continuation of lactation by influencing lactogenesis. It is responsible for the  
321 synthesis of the lactose and milk production found in milk [23]. In our experiment, the  
322 duration of a rumen pH less than 5.8 lasted for 4h in the goats fed a high-concentrate  
323 diet. According to the definition of experimental SARA, HG goats were suffering  
324 from SARA disease. However, after feeding 19 weeks, the buffering agent added to  
325 the high-concentrate diet stabilized ruminal pH and prevented the occurrence of  
326 SARA. Meanwhile, a increase in the milk yield and lactose content was observed in  
327 the BG group. The concentrations of prolactin in blood was also markedly increased.  
328 Therefore, its increased levels in the blood are associated with milk yield and lactose  
329 content improvement.

330 It is well known that the feeding of HC diets leads to the translocation of LPS from  
331 gram-negative bacteria in the gastrointestinal tract into the circulating blood. Other  
332 studies showed that feeding a diet containing 60% concentrate to lactating goats  
333 elevated blood LPS concentrations[24]. The increased levels of circulating LPS also  
334 can elevated the concentration of blood pro-inflammatory cytokines IL-1 $\beta$  and TNF- $\alpha$   
335 and activation of liver inflammatory responses [25,26]. The biochemical parameters



336 ALT, AST and AKP in peripheral blood are common indicators used to assess the  
337 status of liver function<sup>27</sup>. In particular, ALT is a specific parameter that reflects  
338 hepatocyte damage. In the present study, we observed that feeding of a HC diets  
339 induced the massive release of LPS in the rumen, which could trigger a local or  
340 systemic inflammatory response after the translocation of LPS into the bloodstream.  
341 Furthermore, our data demonstrated that the feeding of a HC diets significantly  
342 increased the concentrations of LPS, TNF- $\alpha$  and IL-1 $\beta$  in the plasma. The increase in  
343 blood pro-inflammatory cytokines is consistent with the translocation of LPS and  
344 activation of inflammatory responses. In addition, the concentrations of ALT, ALP and  
345 AKP in peripheral blood were also higher in the HG goats compared to the BG goats.  
346 These results provide insight into feeding the HC diets resulted in the breach of  
347 hepatocytes releasing these enzymes into the circulation. Importantly, the results  
348 showed that those pro-inflammatory cytokines, LPS, TNF- $\alpha$  and IL-1 $\beta$  in the plasma  
349 of the BG goats were significantly lower than that in the HG goats. Therefore, we  
350 hypothesized that the buffering agent added to the high-concentrate diet reduced the  
351 release of the rumen LPS and stabilized the body health of lactating goats.

352 Compared to monogastric animals, glucose is supplied primarily by hepatic  
353 gluconeogenesis to maintain stable blood glucose content in the ruminants<sup>10</sup>.  
354 Therefore, the liver plays a crucial physiological role in the body, and is responsible  
355 for glucose metabolism. Our study documented that feeding HC diet to lactating goats  
356 for a long time leads to the LPS-cytokines-induced the inflammatory response, and  
357 increases the consumption and catabolism of glucose in liver [28]. GH is a polypeptide

358 hormone synthesized and secreted by the anterior pituitary gland, which plays a key  
359 role in regulating ruminant mammary gland development and lactation [29]. It is  
360 important for regulating glycometabolism, in part through its promotion of  
361 gluconeogenesis in the liver [30]. The body's health is essential to the normal  
362 production of hormones. However, the increased translocation of LPS may into the  
363 brain via the blood enhances the inflammatory response, which might be ultimately  
364 affect on the levels of the growth hormone. PEPCK and G6PC are two key hepatic  
365 gluconeogenic enzymes the expression and activity of which are increased hepatic  
366 glucose output [31]. PC is the first regulatory enzyme in gluconeogenic pathway that  
367 converts pyruvate to oxaloacetate in gluconeogenesis [32]. Major glucose precursors  
368 of ruminant liver include propionate, amino acids and lactate. It has been documented  
369 that the increased proportion of propionate may be related to glycogenesis in ruminant.  
370 Because most VFA emerge in the portal vein after absorption from the digestive tract  
371 [33], alterations in proportion of propionate influence the gluconeogenesis in the liver.  
372 Therefore, the liver gluconeogenesis plays a crucial physiological role in maintaining  
373 the body blood sugar levels, as it is the main organ for glucose storage, in the form of  
374 glycogen, as well as endogenous glucose production [34]. Our results indicated that  
375 the buffering agent added to the high-concentrate diet significantly decreased the total  
376 VFA, propionate and butyrate levels in the ruminal fluid. However, the ratio of  
377 propionate to butyrate was increased in the BG group. We also observed that the  
378 buffering agent treatment promoted the expression of PEPCK, PC and G6PC,  
379 indicating that gluconeogenesis in the liver was increased. In addition, the BG diets

380 increased glucose content in hepatic vein. The plasma GH and GHR levels were also  
381 increased in the BG goats: elevated GH increases the glucose content and activity of  
382 gluconeogenesis in the liver. Meanwhile, the buffering agent added to the HC diet  
383 inhibited the consumption of glucose and stabilized the liver health of lactating goats.  
384 Taken together, these findings suggest that the feeding of BG diets can promote liver  
385 gluconeogenesis by the increased proportion of propionate in the rumen, and the  
386 increased entry of glucose into the blood through the hepatic vein.

387 In lactating animals, providing glucose for the mammary gland is a metabolic priority  
388 because glucose is the primary precursor for lactose synthesis in the mammary gland.  
389 Once taken up by the lactating mammary epithelial cell, glucose is either used in the  
390 synthesis of lactose or processed by glycolysis to provide energy. Lactose is  
391 synthesized from free glucose and uridine diphosphate (UDP)-galactose by lactose  
392 synthase catalysis [35]. The mammary gland itself cannot synthesize glucose from  
393 other precursors because of the lack of glucose-6-phosphatase [8,36]. Therefore, the  
394 mammary gland is dependent on the blood supply for its glucose needs. In addition,  
395 lactose maintains the osmolarity of milk, the rate of lactose synthesis serves as a major  
396 factor influencing milk yield. It is also indicated that lactose synthesis and milk yield  
397 show a linear or positive correlation with glucose uptake in the mammary gland of  
398 goats and cows [37,38]. Glucose uptake in the mammary gland is increased  
399 dramatically during lactation. As is known, glucose transport across the plasma  
400 membranes of mammalian cells is carried out by 2 distinct processes: facilitative  
401 transport, mediated by a family of facilitative glucose transporters (GLUT); and

402 sodium-dependent transport, mediated by the Na<sup>+</sup>/glucose cotransporters (SGLT) [39].  
403 An early study demonstrated that facilitated GLUT 1, GLUT 8, GLUT 12 and SGLT1  
404 have different expression in mammary gland [40]. The GLUT1 is ubiquitously  
405 expressed in lactating cow tissues, being most abundant in the mammary gland and  
406 kidney and lowest in the omental fat and skeletal muscle [41]. SGLT1 play a  
407 important role in glucose transport of Golgi membrane [42]. In our experiment, we  
408 found that the glucose content in the plasma of the jugular vein was increased in the  
409 BG group compared to the HG group. GLUT 1, GLUT 8, GLUT 12 and SGLT1  
410 expression in mammary gland were also elevated in the BG goats. Moreover, the level  
411 of GLUT 1 protein was significantly enhanced in mammary gland of BG goats. Taken  
412 together, it is indicated that the buffering agent added to the high-concentrate diet led  
413 to the translocation of more glucose from the peripheral blood into the mammary  
414 epithelial cells and thereby increased the milk yield and lactose content.

#### 415 **Conclusions**

416 In summary, we systematically investigated the effects of the buffering agent on milk  
417 quality of lactating goats and found milk yield and lactose content were increased.  
418 Furthermore, the blood GH and prolactin levels were increased in the BG goats:  
419 elevated GH increases the hepatic gluconeogenesis and activity. Activated  
420 gluconeogenesis promotes levels of blood glucose released from the liver (Figure 9).  
421 Thus, the increased glucose in the hepatic vein during of goats fed a BG diets may be  
422 play a key role in increasing the milk yield and lactose synthesis of lactating goats.  
423 However, the GLUT1, 8, 12 and SGLT1 in mammary gland were also elevated in BG

424 goats. It is possible that the buffering agent added to the HC diet inhibited the release  
425 of inflammatory cytokine and stabilized the mammary gland health of lactating goats.  
426 Then it causes to the increase in glucose transporters in the mammary gland and  
427 prolactin levels in the blood, which could also increase the lactose content in milk.  
428 Therefore, further research is needed to elucidate the underlying mechanism.

#### 429 **Author contributions**

430 L.L. performed the experiment and drafted the manuscript. M.H., and Y.L.  
431 performed the experiment and analysed the data. Y.Z. contributed to experimental  
432 design and manuscript revision. L.L., and Y.Z. conceived the idea, designed the  
433 experiment and finalized the manuscript. All authors read and approved the final  
434 manuscript.

#### 435 **Acknowledgements**

436 All authors thank Xiangzhen Shen (Department of clinical veterinary, Nanjing  
437 Agricultural University) for technical help during animal experimentation.

#### 438 **Compliance with Ethical Standards**

439 The study was approved by the ethical committee of Nanjing agricultural university.

#### 440 **Funding**

441 This work was supported by grants from the National Basic Research Program of  
442 China (project No. 2011CB100802), the National Nature Science Foundation of  
443 China (project No.31172371) and the Priority Academic Program Development of

444 Jiangsu Higher Education Institutions (PAPD).

445 **Competing interests**

446 The authors declare that they have no financial, personal or professional interests that  
447 would have influenced the content of the paper or interfered with their objective  
448 assessment of the manuscript.

449 **References**

450 (1) Xu T, Tao H, Chang G, Zhang K, Xu L & Shen X (2015). Lipopolysaccharide  
451 derived from the rumen down-regulates stearoyl-CoA desaturase 1 expression and  
452 alters fatty acid composition in the liver of dairy cows fed a high-concentrate diet.

453 *BMC veterinary research* **11**,

454 (2) Chen Y & Oba M (2012). Variation of bacterial communities and expression of  
455 Toll-like receptor genes in the rumen of steers differing in susceptibility to subacute  
456 ruminal acidosis. *Vet Microbiol* **159**, 451-459.

457 (3) Emmanuel DG, Dunn SM, Ametaj BN. Feeding high proportions of barley grain  
458 stimulates an inflammatory response in dairy cows. *J Dairy Sci.* 2008;91(2):606–14.

459 (4) Beauchemin KA, Yang WZ & Rode LM (2003). Effects of particle size of  
460 alfalfa-based dairy cow diets on chewing activity, ruminal fermentation, and milk  
461 production. *J Dairy Sci* **86**, 630-643.

462 (5) Tao S, Tian J, Cong R, Sun L, Duanmu Y, Dong H, Ni Y & Zhao R (2015).  
463 Activation of cellular apoptosis in the caecal epithelium is associated with increased

- 464 oxidative reactions in lactating goats after feeding a high-concentrate diet. *Exp*  
465 *Physiol* **100**, 278-287.
- 466 (6) Duanmu Y, Cong R, Tao S, Tian J, Dong H, Zhang Y, Ni Y & Zhao R (2016).  
467 Comparative proteomic analysis of the effects of high-concentrate diet on the  
468 hepatic metabolism and inflammatory response in lactating dairy goats. *J Anim Sci*  
469 *Biotechnol* **7**, 1.
- 470 (7) Neville MC, Allen JC & Watters C (1983). The mechanisms of milk secretion.  
471 *Lactation. Springer US* **49**, 102.
- 472 (8) Threadgold LC & Kuhn NJ (1979). Glucose-6-phosphate hydrolysis by lactating  
473 rat mammary gland. *Int J Biochem* **10**, 683-685.
- 474 (9) Kronfeld DS (1982). Major metabolic determinants of milk volume, mammary  
475 efficiency, and spontaneous ketosis in dairy cows. *J Dairy Sci* **65**, 2204-2212.
- 476 (10) Reynolds CK (2006). Production and metabolic effects of site of starch digestion  
477 in dairy cattle. *Anim. Feed Sci. Technol* **130**, 78-94.
- 478 (11) Li WQ, Bu DP, Wang JQ, Nan XM, Sun P & Zhou LY (2013). Effect of two  
479 different diets on liver gene expression associated with glucose metabolism in dairy  
480 cows. *Livest Sci* **158**, 223-229.
- 481 (12) Lingxin D & Runhou Z (2000). Effects of supplementing by-pass protein and  
482 buffer additives in the diet of lactating cows on milk output and composition. *Xibei*  
483 *Nonglin Keji Daxue Xuebao (China)*.

484

485 (13) Islam SMS, Hossain MA, Hashim MMA, Sarker MSA & Paul AK (2014).  
486 Effects of sodium bicarbonate on induced lactic acidosis in Black Bengal  
487 goats. *Wayamba J Anim Sci* **6**, 1044-1057.

488 (14) Stoddard GE, Allen NN, Hale WH, Pope AL, Sorensen DK & Winchester WR  
489 (1951) A permanent rumen fistula cannula for cows and sheep. *J Anim Sci* **10**,  
490 417-423.

491 (15) Huntington GB, Reynolds CK & Stroud BH (1989). Techniques for measuring  
492 blood flow in splanchnic tissues of cattle. *J Dairy Sci* **72**, 1583-1595.

493 (16) Tao S, Han Z, Tian J, Cong R, Duanmu Y, Dong H, Ni Y & Zhao R (2016).  
494 Downregulation of prostaglandin E2 is involved in hindgut mucosal damage in  
495 lactating goats fed a high-concentrate diet. *Exp Physiol* **101**, 272-281.

496 (17) Li L, Cao Y, Xie Z, Zhang Y (2017). A High-Concentrate Diet Induced Milk Fat  
497 Decline via Glucagon-Mediated Activation of AMP-Activated Protein Kinase in  
498 Dairy Cows. *Sci Rep* **7**, 44217.

499 (18) Plaizier JC, Krause DO, Gozho GN & McBride BW (2008). Subacute ruminal  
500 acidosis in dairy cows: The physiological causes, incidence and consequences. *The*  
501 *Vet J* **176**, 21-31.

502 (19) Li S, Khafipour E, Krause DO, Kroeker A, Rodriguez-Lecompte JC, Gozho GN  
503 & Plaizier JC (2012). Effects of subacute ruminal acidosis challenges on



504 fermentation and endotoxins in the rumen and hindgut of dairy cows. *J Dairy Sci* **95**,  
505 294–303.

506 (20) Chang G, Zhang K, Xu T, Jin D, Seyfert HM, Shen X & Zhuang S (2015).  
507 Feeding a high-grain diet reduces the percentage of LPS clearance and enhances  
508 immune gene expression in goat liver. *BMC Vet Res* **11**, 1.

509 (21) Cruywagen CW, Taylor S, Beya MM & Calitz T (2015). The effect of buffering  
510 dairy cow diets with limestone, calcareous marine algae, or sodium bicarbonate on  
511 ruminal pH profiles, production responses, and rumen fermentation. *J Dairy Sci* **98**,  
512 5506-5514.

513 (22) Lee MJ & Hsu AL (1991). Effect of supplementation of sodium bicarbonate and  
514 magnesium oxide in diet on lactating performance and rumen characteristics of  
515 dairy goats. *J Chin Soc Anim Sci* **20**, 431-442.

516 (23) Alipanah M, Kalashnikova L & Rodionov G (2007). Association of prolactin  
517 gene variants with milk production traits in Russian Red Pied cattle. *Iran J*  
518 *Biotechnol* **5**, 158-161.

519 (24) Dong H, Wang S, Jia Y, Ni Y, Zhang Y, Zhuang S, Shen X & Zhao R (2013).  
520 Long-term effects of subacute ruminal acidosis (SARA) on milk quality and hepatic  
521 gene expression in lactating goats fed a high-concentrate diet. *PLoS One* **8**, e82850.

522 (25) Chang G, Zhuang S, Seyfert HM, Zhang K, Xu T, Jin D, Guo J & Shen X (2015).  
523 Hepatic TLR4 signaling is activated by LPS from digestive tract during SARA, and

524 epigenetic mechanisms contribute to enforced TLR4 expression. *Oncotarget* **6**,  
525 38578.

526 (26) Duanmu Y, Cong R, Tao S, Tian J, Dong H, Zhang Y, Ni Y & Zhao R (2016).  
527 Comparative proteomic analysis of the effects of high-concentrate diet on the  
528 hepatic metabolism and inflammatory response in lactating dairy goats. *J Anim Sci*  
529 *Biotechnol* **7**, 5.

530 (27) Sevinc M, Basoglu A, Birdane FM & Boydak M (2001). Liver function in dairy  
531 cows with fatty liver. *Revue de Medecine Veterinaire (France)*.

532 (28) Jiang X, Zeng T, Zhang S & Zhang Y (2013). Comparative proteomic and  
533 bioinformatic analysis of the effects of a high-grain diet on the hepatic metabolism  
534 in lactating dairy goats. *PloS one* **8**, e80698.

535 (29) Akers RM (2006). Major advances associated with hormone and growth factor  
536 regulation of mammary growth and lactation in dairy cows. *J Dairy Sci* **89**,  
537 1222-1234.

538 (30) Emmison N, Agius L & Zammit VA (1991). Regulation of fatty acid metabolism  
539 and gluconeogenesis by growth hormone and insulin in sheep hepatocyte cultures.  
540 Effects of lactation and pregnancy. *Biochem J* **274**, 21-26.

541 (31) Lochhead PA, Salt IP, Walker KS, Hardie DG & Sutherland C (2000).  
542 5-aminoimidazole-4-carboxamide riboside mimics the effects of insulin on the  
543 expression of the 2 key gluconeogenic genes PEPCCK and

- 544 glucose-6-phosphatase. *Diabetes* **49**, 896-903.
- 545 (32) Pershing RA, Moore SEM, Dinges AC, Thatcher WW & Badinga L (2002). Short  
546 communication: hepatic gene expression for gluconeogenic enzymes in lactating  
547 dairy cows treated with bovine somatotropin. *J Dairy Sci* **85**, 504-506.
- 548 (33) Bergman EN (1990). Energy contributions of volatile fatty acids from the  
549 gastrointestinal tract in various species. *Physiol Rev* **70**, 567-590.
- 550 (34) Sharabi K, Tavares CD, Rines AK & Puigserver P (2015). Molecular  
551 pathophysiology of hepatic glucose production. *Mol Aspects Med* **46**, 21-33.
- 552 (35) Watkins WM & Hassid WZ (1962). Synthesis of Lactose by Particulate Enzyme  
553 Preparations from Guinea Pig and Bovine Mammary Glands. *Sci* **136**, 329.
- 554 (36) Scott RA, Bauman DE & Clark JH (1976). Cellular gluconeogenesis by lactating  
555 bovine mammary tissue. *J Dairy Sci* **59**, 50-56.
- 556 (37) Cant JP, Trout DR, Qiao F & Purdie NG (2002). Milk synthetic response of the  
557 bovine mammary gland to an increase in the local concentration of arterial  
558 glucose. *J Dairy Sci* **85**, 494-503.
- 559 (38) Huhtanen P, Vanhatalo A & Varvikko T (2002). Effects of abomasal infusions of  
560 histidine, glucose, and leucine on milk production and plasma metabolites of dairy  
561 cows fed grass silage diets. *J Dairy Sci* **85**, 204-216.
- 562 (39) Zhao FQ & Keating AF (2007). Functional properties and genomics of glucose  
563 transporters. *Curr Genomics* **8**, 113-128.

564 (40) Zhao FQ & Keating AF (2007). Expression and regulation of glucose transporters  
565 in the bovine mammary gland. *J Dairy Sci* **90**, E76-E86.

566 (41) Zhao FQ, Glimm DR & Kennelly JJ (1993). Distribution of mammalian  
567 facilitative glucose transporter messenger RNA in bovine tissues. *Int J Biochem* **25**,  
568 1897-1903.

569 (42) Faulkner A, Chaiyabutr N, Peaker M, Carrick DT & Kuhn NJ (1981). Metabolic  
570 significance of milk glucose. *J Dairy Res* **48**, 51-56.

571

572

573 **Table**

574 **Table 1. Composition and nutrient levels of experimental diets**

---

Concentrate : Forage ratio 6 : 4

---

| Ingredient (%)      |       |
|---------------------|-------|
| Leymus chinensis    | 27.00 |
| Alfalfa silage      | 13.00 |
| Corn                | 23.24 |
| Wheat bran          | 20.77 |
| Soybean meal        | 13.67 |
| Limestone           | 1.42  |
| NaCl                | 0.30  |
| Premix <sup>a</sup> | 0.60  |

---

|                              |        |
|------------------------------|--------|
| Total                        | 100.00 |
| Nutrient levels <sup>b</sup> |        |
| Net energy/(MJ.kg-1)         | 6.71   |
| Crude protein/%              | 16.92  |
| Neutral detergent fiber/%    | 31.45  |
| Acid detergent fiber/%       | 17.56  |
| Calcium/%                    | 0.89   |
| Phosphorus/%                 | 0.46   |

575 a. Provided per kg of diet: VA 6000IU/kg, VD 2500IU/kg, VE 80mg/kg, Cu 6.25 mg/kg, Fe 62.5

576 mg/kg, Zn 62.5 mg/kg, Mn 50mg/kg, I 0.125 mg/kg, Co 0.125 mg/kg.

577 b. Nutrient levels were according to National Research Council (NRC,2001).

578 **Table 2. Primer sequences and product size**

| Target genes | Primer sequences (5'-3') | Products/bp |
|--------------|--------------------------|-------------|
| G6PC         | CCCACAGCTTCAACAAACTCTT   | 230         |
|              | GATGTCCATGCCATTCTCCTT    |             |
| PEPCK        | CCCTACTCTCCCGGGATGGAAAGT | 306         |
|              | GCCCTCCGAAGATGATGCCCTCAA |             |
| PC           | CCCACAGCTTCAACAAACTCTT   | 352         |
|              | GATGTCCATGCCATTCTCCTT    |             |
| GLUT1        | AGACACCTGAGGAGCTGTTC     | 233         |
|              | GACATCACTGCTGGCTGAAG     |             |
| GLUT8        | TGGCATCTACAAGCCCTTCA     | 244         |
|              | ACCATGACCACACCTGACAA     |             |

|        |                       |     |
|--------|-----------------------|-----|
| GLUT12 | ACGTGACCATGGTACCTGTT  | 321 |
|        | TCCCAAGTTCATACCCCACC  |     |
| SGLT1  | GCAAGAGAGTCAATGAGCCG  | 235 |
|        | ATGGCCAGGATGACGATGAT  |     |
| GHR    | TTGGAATACTTGGGCTAACA  | 262 |
|        | GACCCTTCAGTCTTCTCATCG |     |
| GAPDH  | GGGTCATCATCTCTGCACCT  | 177 |
|        | GGTCATAAGTCCCTCCACGA  |     |

579 Abbreviations: PC, pyruvate carboxylase; PEPCK, phosphoenolpyruvate carboxykinase; G6PC,  
580 glucose-6-phosphatase; GLUT1, glucose transporter type 1; GLUT8, glucose transporter type 8;  
581 GLUT12, glucose transporter type 12; SGLT1, sodium-glucose cotransporter 1; GHR, growth  
582 hormone receptor.

583

584 **Table 3. Effects of the buffering agent treatment on rumen fermentation**  
585 **parameters in goats**

| Item                | BG           | HG            | P-value |
|---------------------|--------------|---------------|---------|
| LPS, EU/mL          | 25201 ± 3398 | 43395 ± 4723  | 0.002** |
| Total VFA, mM       | 90.20 ± 3.55 | 116.37 ± 8.14 | 0.04*   |
| Acetate, mM         | 58.28 ± 2.45 | 65.48 ± 5.45  | 0.39    |
| Propionate, mM      | 17.01 ± 0.25 | 22.45 ± 1.51  | 0.03*   |
| Butyrate, mM        | 12.65 ± 1.77 | 18.36 ± 1.79  | 0.02*   |
| Acetate: Propionate | 3.41 ± 0.58  | 2.9 ± 0.21    | 0.11    |

Propionate: Butyrate       $1.34 \pm 0.05$        $1.22 \pm 0.12$       0.03\*

586 Abbreviations: HG, high-concentrate diet group; BG, buffering agent group; LPS,  
587 lipopolysaccharide; VFA, volatile fatty acid. Values are shown as means  $\pm$  SEM, n = 8/group. \**P*  
588 < 0.05, \*\**P* < 0.01 compared with the HG group.

589 **Table 4. Effects of the buffering agent treatment on plasma enzyme, primary**  
590 **pro-inflammatory cytokines, metabolic produced and hormone of lactating goats**

| Item                         | BG                 | HG                 | P-value |
|------------------------------|--------------------|--------------------|---------|
| Plasma biochemical parameter |                    |                    |         |
| ALT (IU/L)                   | $40.33 \pm 2.84$   | $77.67 \pm 10.44$  | 0.03*   |
| AST (IU/L)                   | $43.33 \pm 4.48$   | $71.33 \pm 8.67$   | 0.04*   |
| LDH (IU/L)                   | $233.66 \pm 16.45$ | $243.66 \pm 13.54$ | 0.66    |
| AKP (IU/L)                   | $109.67 \pm 17.07$ | $213.5 \pm 20.50$  | 0.02*   |
| TNF- $\alpha$ (ng/mL)        | $2.47 \pm 0.30$    | $4.61 \pm 0.48^*$  | 0.03*   |
| IL-1 $\beta$ (ng/mL)         | $0.74 \pm 0.03$    | $0.79 \pm 0.05$    | 0.04*   |
| LPS (EU/mL)                  | $1.82 \pm 0.14$    | $3.76 \pm 1.13$    | 0.04*   |
| Histamine (ng/mL)            | $1.99 \pm 0.06$    | $2.11 \pm 0.09$    | 0.09    |
| Lactate (mmol/L)             | $0.95 \pm 0.05$    | $1.39 \pm 0.16^*$  | 0.04*   |
| Hormone levels               |                    |                    |         |
| Prolactin (pg/mL)            | $436.57 \pm 37.78$ | $373.29 \pm 30.59$ | 0.04*   |
| Glucocorticoids (ng/mL)      | $10.2 \pm 1.67$    | $9.8 \pm 2.56$     | 0.08    |
| Growth hormone (ng/mL)       | $0.94 \pm 0.08$    | $0.67 \pm 0.03$    | 0.03*   |

591 Abbreviations: BG, buffering agent group; HG, high-concentrate diet group; ALT, alanine  
592 aminotransferase; AST, aspartate transaminase; LDH, lactic dehydrogenase; AKP, alkaline

593 phosphatase; TNF- $\alpha$ , tumor necrosis factor- $\alpha$ ; IL-1 $\beta$ , interleukin 1 $\beta$ ; LPS, lipopolysaccharide;

594 Values are shown as means  $\pm$  SEM, n = 8/group. \* $P$  < 0.05 compared with the HG group.

595

596 **Table 5. The average concentrations of glucose in plasma of hepatic vein, portal**

597 **vein and jugular vein of lactating goats**

| Glucose (mmol/L) | BG               | HG              | Effect, p-value |       |                    |
|------------------|------------------|-----------------|-----------------|-------|--------------------|
|                  |                  |                 | Diet            | Time  | Diet $\times$ Time |
| Hepatic vein     |                  |                 |                 |       |                    |
| 0h               | 3.34 $\pm$ 0.37* | 3.01 $\pm$ 0.18 | 0.003           | 0.292 | 0.636              |
| 4h               | 3.35 $\pm$ 0.37* | 3.15 $\pm$ 0.18 |                 |       |                    |
| 8h               | 3.44 $\pm$ 0.37* | 3.07 $\pm$ 0.18 |                 |       |                    |
| Portal vein      |                  |                 |                 |       |                    |
| 0h               | 3.27 $\pm$ 0.11  | 3.26 $\pm$ 0.13 | 0.102           | 0.902 | 0.494              |
| 4h               | 3.28 $\pm$ 0.12  | 3.27 $\pm$ 0.12 |                 |       |                    |
| 8h               | 3.27 $\pm$ 0.09  | 3.25 $\pm$ 0.15 |                 |       |                    |
| Jugular vein     |                  |                 |                 |       |                    |
| 0h               | 3.30 $\pm$ 0.05  | 3.27 $\pm$ 0.09 | 0.002           | 0.890 | 0.579              |
| 4h               | 3.33 $\pm$ 0.24  | 3.29 $\pm$ 0.12 |                 |       |                    |
| 8h               | 3.34 $\pm$ 0.14  | 3.25 $\pm$ 0.04 |                 |       |                    |

598 Abbreviations: HG, high-concentrate diet group; BG, buffering agent group. Values are shown as

599 means  $\pm$  SEM, n = 8/group. \* $P$  < 0.05 compared with the HG group.

600



601 **Figure 1. Comparison of the average weekly lactose content and milk yield**  
602 **between the buffering agent (BG) and high-concentrate diet (HG) groups.** Values  
603 are shown as means  $\pm$  SEM, n = 8/group. \* $P$  < 0.05 compared with the HG group.

604 **Figure 3. pH value in ruminal fluid after 19 weeks feeding regime.** Data were  
605 analyzed for differences due to diet, time, and their interactions by Univariate using the General  
606 Linear Models of SPSS 11.0 for Windows (StatSoft Inc, Tulsa, OK, USA). Values are mean  $\pm$   
607 SEM, n = 8/group. \* $P$  < 0.05 compared with the HG group.

608 **Figure 3. Effects of buffering agent treatment on the expression of mammary**  
609 **gland glucose transfer genes in lactating goats.** The experiments were repeated three  
610 times. Values are shown as means  $\pm$  SEM, n = 3. \* $P$  < 0.05 compared with the HG group.

611 **Figure 4. Effects of buffering agent treatment on the expression of liver**  
612 **gluconeogenesis genes in lactating goats.** The experiments were repeated three times.  
613 Values are shown as means  $\pm$  SEM, n = 3. \* $P$  < 0.05, compared with the HG group.

614 **Figure 5. Effects of buffering agent treatment on the expression of GHR in livers**  
615 **of lactating goats.** The experiments were repeated three times. Values are shown as means  $\pm$   
616 SEM, n = 3. \* $P$  < 0.05 compared with the HG group.

617 **Figure 6. Growth hormone activates the gluconeogenesis to regulate glucose**  
618 **synthesis in the liver.** Abbreviations: PEPCK, phosphoenolpyruvate Carboxykinase; PC,  
619 pyruvate carboxylase; G6PC, glucose-6-phosphatase.

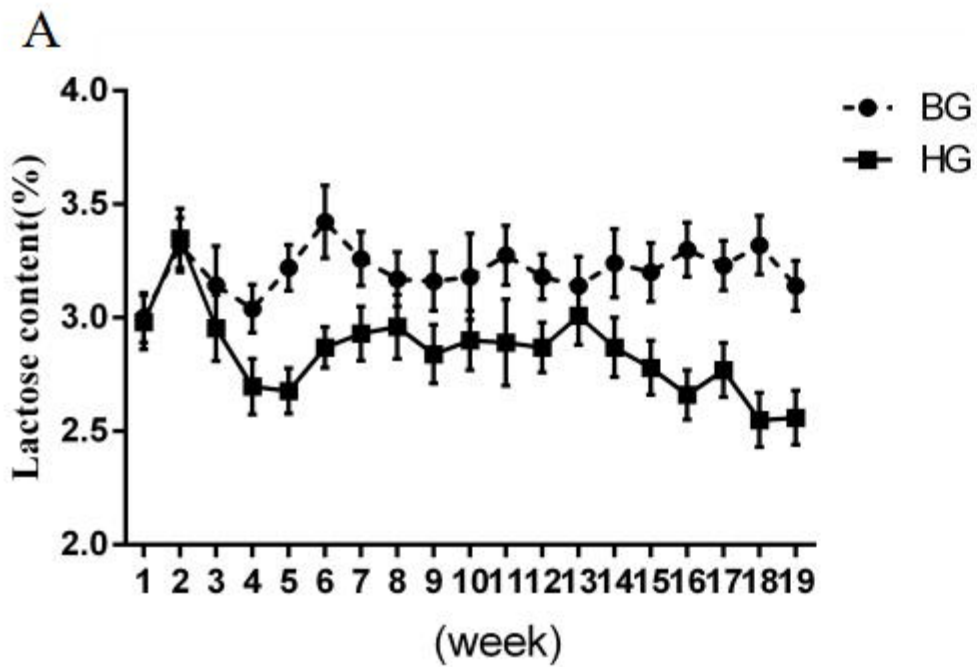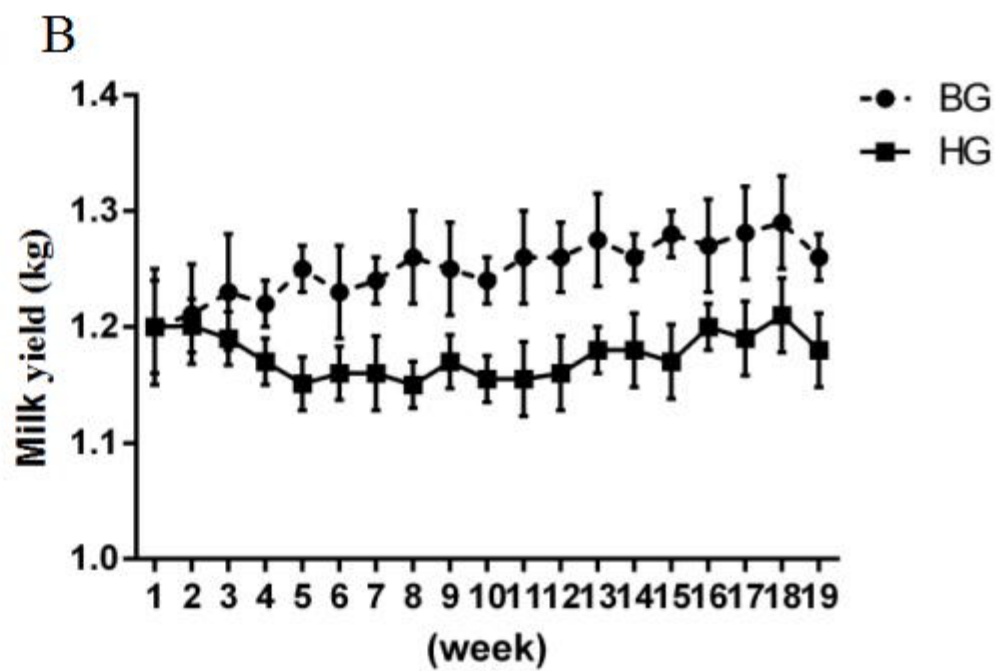

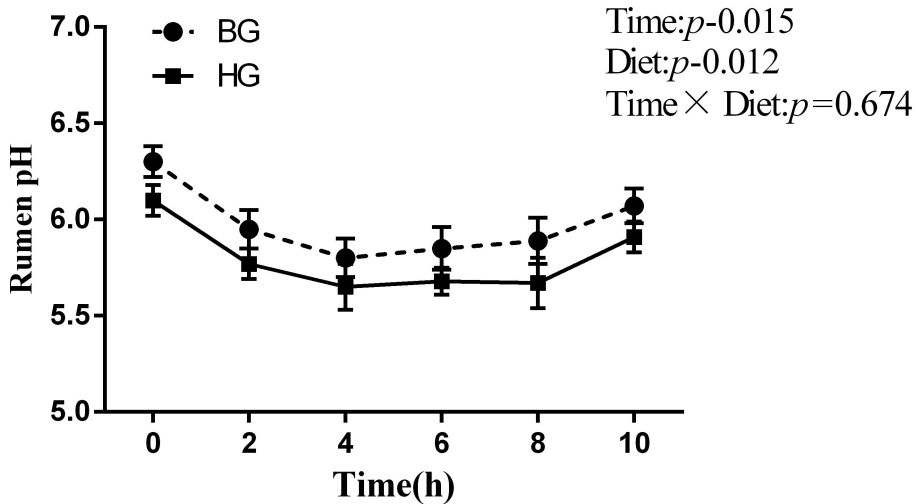

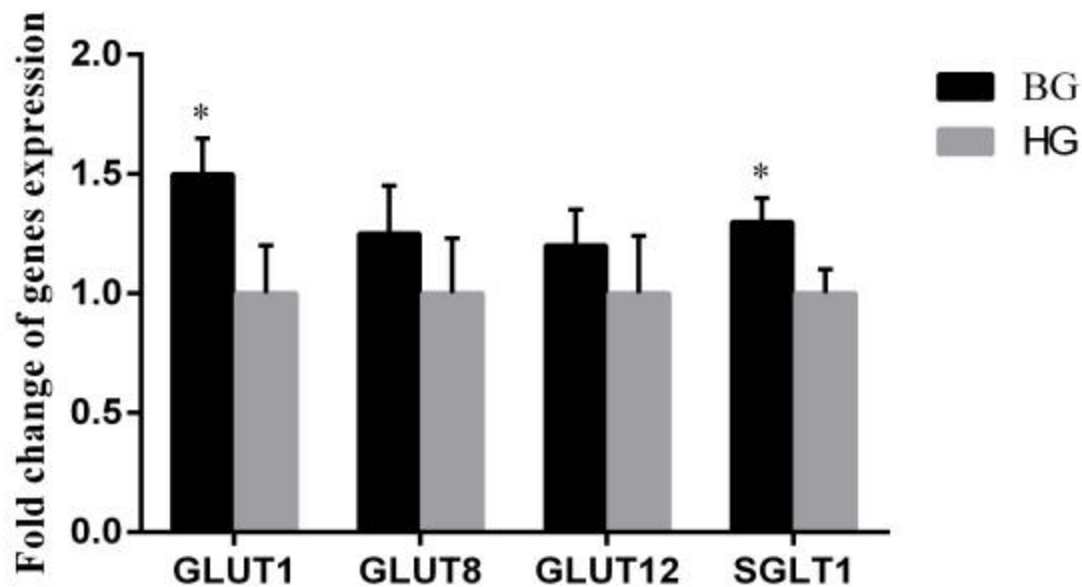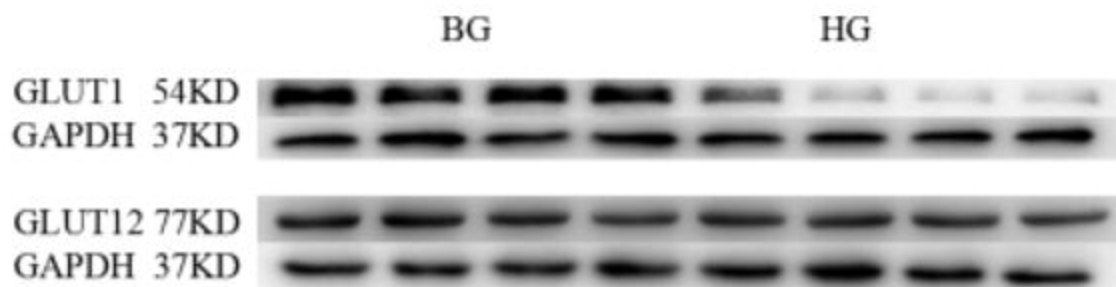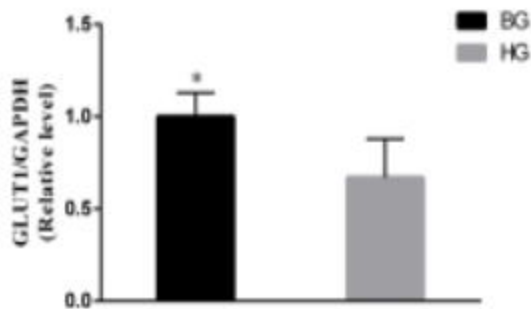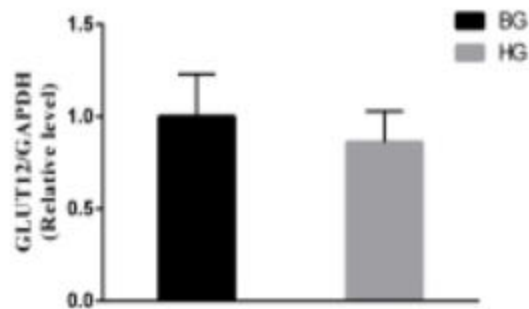

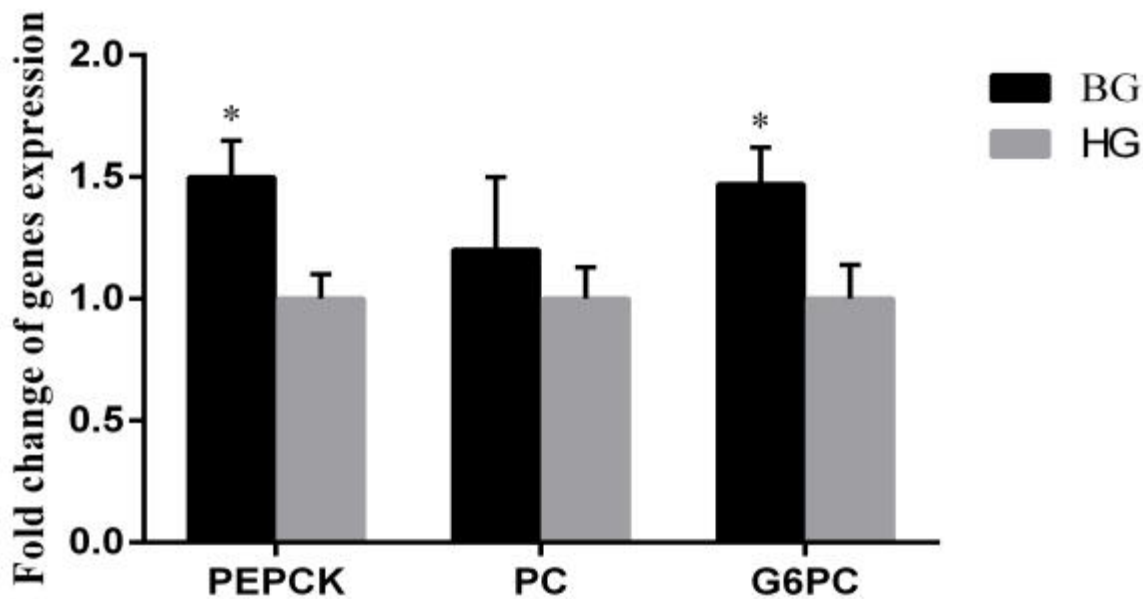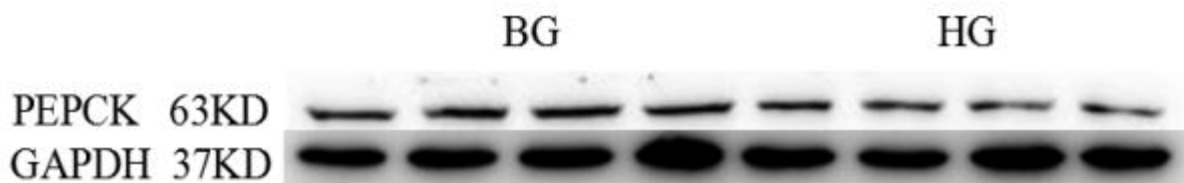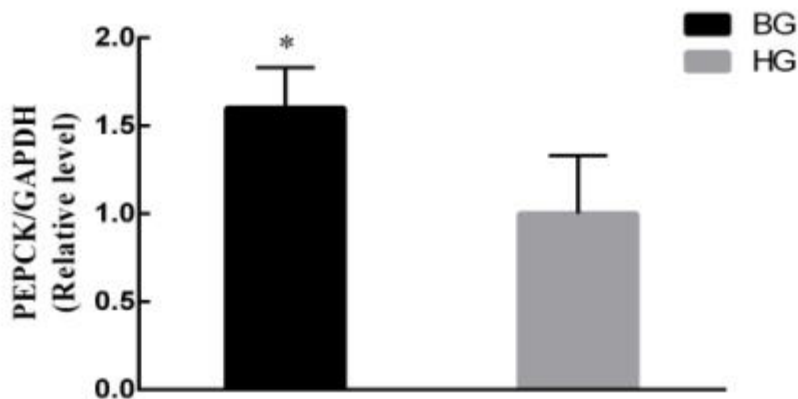

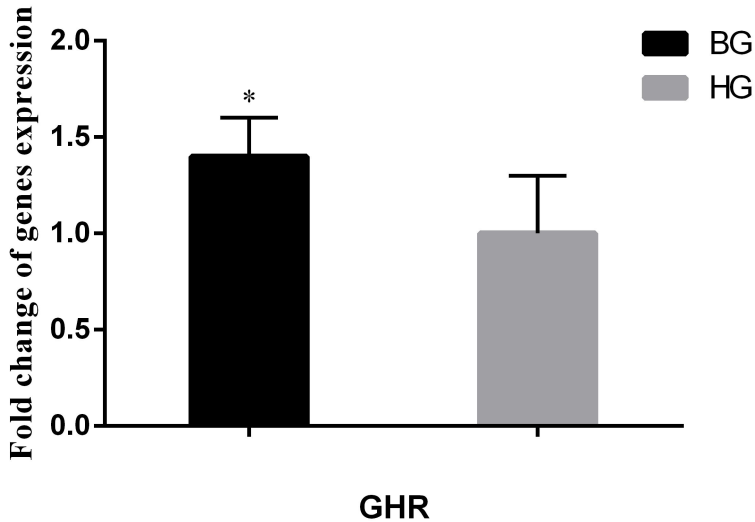

0.2% NaHCO<sub>3</sub>,  
0.1% MgO

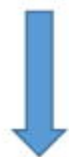

The proportion  
of propionate ↑  
(Digestive tract)

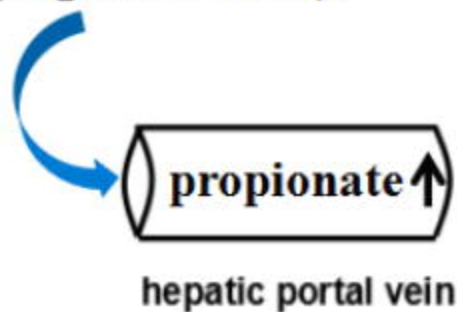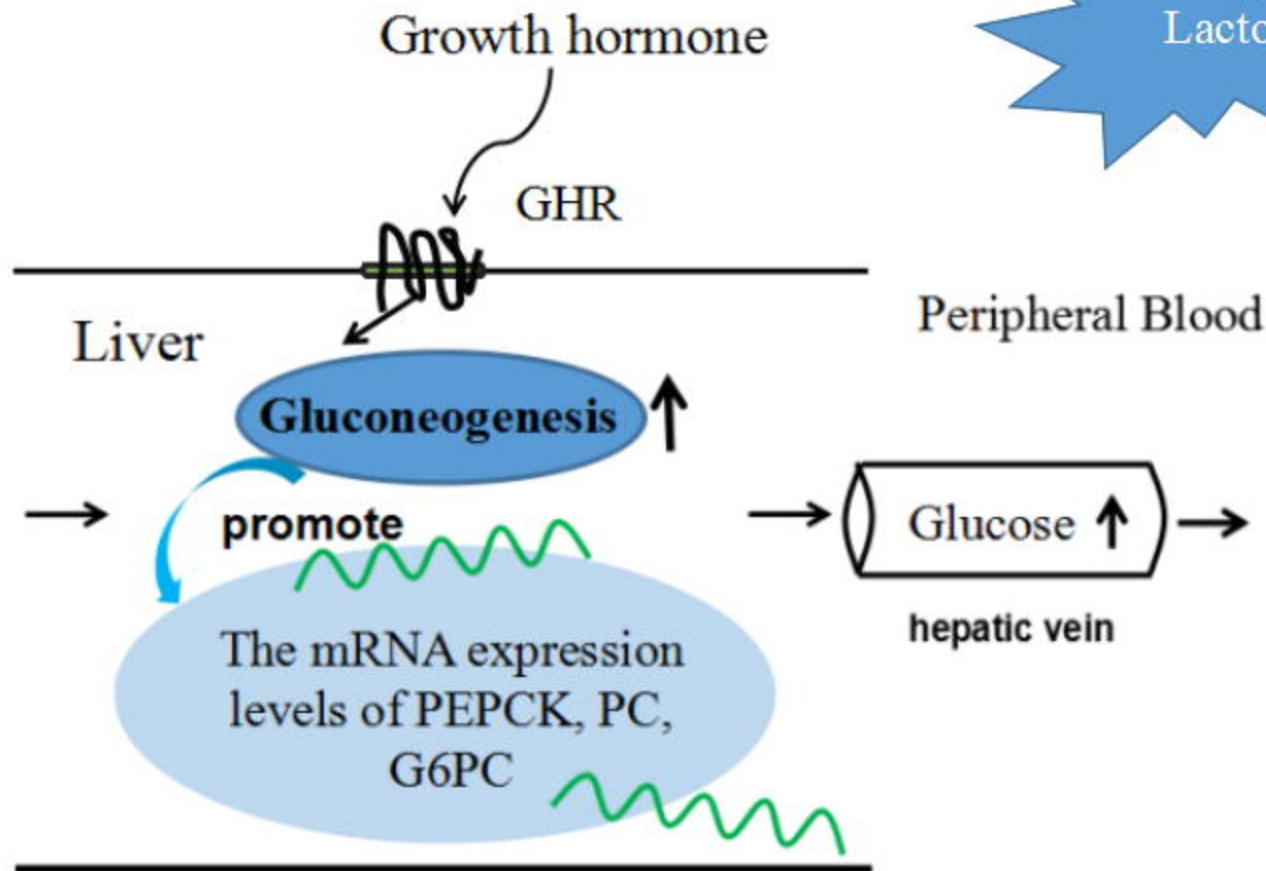

Source: http://biorxiv.org/content/10.1101/155291v1.full.pdf
